# Supplementary material for: Open shell (4n + 2)π and closed shell 4nπ planar core-modified decaphyrins
Source: Royal Society of Chemistry journal article supplement (doi:10.1039/d3sc05251f), 2024-01-01
Supplement: d3sc05251f2.pdf [file d3sc05251f2.pdf]

All calculations were performed with unrestricted spin and 6-31g(d,p) level of theory using the different functions. e.g. **ucam-b3lyp/6-31g(d,p)**

| <b>Function</b>  | <b>S2<br/>Before annihilation</b> | <b>S2<br/>After annihilation</b> |
|------------------|-----------------------------------|----------------------------------|
| <b>LSDA</b>      | 0                                 | 0                                |
| <b>BPV86</b>     | 0                                 | 0                                |
| <b>B3LYP</b>     | 0.86                              | 1.06                             |
| <b>CAM-B3LYP</b> | 1.86                              | 6.42                             |
| <b>B3PW91</b>    | 0.95                              | 1.38                             |
| <b>MPW1PW91</b>  | 1.27                              | 3.05                             |
| <b>PBEPBE</b>    | 0                                 | 0                                |
| <b>HSEH1PBE</b>  | 0                                 | 0                                |
| <b>HCTH</b>      | 0                                 | 0                                |
| <b>TPSSTPSS</b>  | 0                                 | 0                                |
| <b>WB97XD</b>    | 1.81                              | 6.10                             |

- The coordinates of **15** obtained using above functions are given in PDF\_2

Coordinates of decaphyrin **15**, obtained using different functions.

\*To reduce the computational cost, the all meso-substituents of the ring **15** were removed.

**(1) Function and Basis set-ub3lyp/6-31g(d,p)**

| Atom | X         | Y        | Z        |
|------|-----------|----------|----------|
| S    | 0.39162   | -1.85159 | 3.71017  |
| S    | -2.86981  | -2.37923 | 3.12655  |
| S    | 4.63286   | -0.64061 | 3.32882  |
| S    | -6.8011   | -2.07653 | 0.02533  |
| S    | 7.32104   | 0.65814  | 2.62672  |
| C    | -0.32982  | -1.75885 | 2.1059   |
| C    | 0.64034   | -1.39293 | 1.17109  |
| H    | 0.42167   | -1.27518 | 0.11673  |
| C    | 1.91276   | -1.19074 | 1.71789  |
| H    | 2.77617   | -0.90943 | 1.12552  |
| C    | 1.98097   | -1.39539 | 3.09588  |
| C    | -1.71195  | -2.01107 | 1.85896  |
| C    | -4.21556  | -2.48417 | 1.97271  |
| C    | -3.72275  | -2.25263 | 0.6767   |
| H    | -4.33703  | -2.30981 | -0.21086 |
| C    | -2.35408  | -1.99285 | 0.61718  |
| H    | -1.82937  | -1.80374 | -0.31187 |
| C    | 3.11138   | -1.26785 | 3.95234  |
| C    | 3.24066   | -1.56536 | 5.31006  |
| H    | 2.42444   | -1.96965 | 5.89867  |
| C    | 4.50879   | -1.3057  | 5.83115  |
| H    | 4.78124   | -1.48135 | 6.86398  |
| C    | 5.43002   | -0.78234 | 4.90472  |
| C    | -5.52709  | -2.75772 | 2.45178  |
| C    | -6.70443  | -2.67014 | 1.69177  |
| C    | -8.01704  | -2.99233 | 2.13195  |
| H    | -8.19867  | -3.37391 | 3.1289   |
| C    | -9.01115  | -2.77358 | 1.20142  |
| H    | -10.05999 | -2.95714 | 1.39505  |
| C    | -8.56315  | -2.26533 | -0.04551 |
| C    | 6.77834   | -0.41814 | 5.17816  |
| C    | 7.68613   | 0.18329  | 4.29499  |
| C    | 9.03334   | 0.54064  | 4.58106  |
| H    | 9.47528   | 0.34307  | 5.54955  |
| C    | 9.70122   | 1.15697  | 3.54524  |
| H    | 10.7243   | 1.50271  | 3.61661  |
| C    | 8.93758   | 1.33443  | 2.36122  |
| C    | -9.36265  | -1.95349 | -1.16602 |
| S    | -0.39162  | 1.85159  | -3.71017 |
| S    | 2.86981   | 2.37923  | -3.12655 |
| S    | -4.63286  | 0.64061  | -3.32882 |
| S    | 6.8011    | 2.07653  | -0.02533 |
| S    | -7.32104  | -0.65814 | -2.62672 |
| C    | 0.32982   | 1.75885  | -2.1059  |
| C    | -0.64034  | 1.39293  | -1.17109 |
| H    | -0.42167  | 1.27518  | -0.11673 |

|   |           |          |          |
|---|-----------|----------|----------|
| C | -1.91276  | 1.19074  | -1.71789 |
| H | -2.77617  | 0.90943  | -1.12552 |
| C | -1.98097  | 1.39539  | -3.09588 |
| C | 1.71195   | 2.01107  | -1.85896 |
| C | 4.21556   | 2.48417  | -1.97271 |
| C | 3.72275   | 2.25263  | -0.6767  |
| H | 4.33703   | 2.30981  | 0.21086  |
| C | 2.35408   | 1.99285  | -0.61718 |
| H | 1.82937   | 1.80374  | 0.31187  |
| C | -3.11138  | 1.26785  | -3.95234 |
| C | -3.24066  | 1.56536  | -5.31006 |
| H | -2.42444  | 1.96965  | -5.89867 |
| C | -4.50879  | 1.3057   | -5.83115 |
| H | -4.78124  | 1.48135  | -6.86398 |
| C | -5.43002  | 0.78234  | -4.90472 |
| C | 5.52709   | 2.75772  | -2.45178 |
| C | 6.70443   | 2.67014  | -1.69177 |
| C | 8.01704   | 2.99233  | -2.13195 |
| H | 8.19867   | 3.37391  | -3.1289  |
| C | 9.01115   | 2.77358  | -1.20142 |
| H | 10.05999  | 2.95714  | -1.39505 |
| C | 8.56315   | 2.26533  | 0.04551  |
| C | -6.77834  | 0.41814  | -5.17816 |
| C | -7.68613  | -0.18329 | -4.29499 |
| C | -9.03334  | -0.54064 | -4.58106 |
| H | -9.47528  | -0.34307 | -5.54955 |
| C | -9.70122  | -1.15697 | -3.54524 |
| H | -10.7243  | -1.50271 | -3.61661 |
| C | -8.93758  | -1.33443 | -2.36122 |
| C | 9.36265   | 1.95349  | 1.16602  |
| H | 5.63357   | 3.03709  | -3.47917 |
| H | -7.12825  | 0.61492  | -6.17    |
| H | -10.39807 | -2.21651 | -1.1058  |
| H | -5.63357  | -3.03709 | 3.47917  |
| H | 7.12825   | -0.61492 | 6.17     |
| H | 10.39807  | 2.21651  | 1.1058   |

(2) Function and Basis set-ucam-b3lyp/6-31g(d,p)

| Atom | X         | Y        | Z        |
|------|-----------|----------|----------|
| S    | 0.39162   | -1.85159 | 3.71017  |
| S    | -2.86981  | -2.37923 | 3.12655  |
| S    | 4.63286   | -0.64061 | 3.32882  |
| S    | -6.8011   | -2.07653 | 0.02533  |
| S    | 7.32104   | 0.65814  | 2.62672  |
| C    | -0.32982  | -1.75885 | 2.1059   |
| C    | 0.64034   | -1.39293 | 1.17109  |
| H    | 0.42167   | -1.27518 | 0.11673  |
| C    | 1.91276   | -1.19074 | 1.71789  |
| H    | 2.77617   | -0.90943 | 1.12552  |
| C    | 1.98097   | -1.39539 | 3.09588  |
| C    | -1.71195  | -2.01107 | 1.85896  |
| C    | -4.21556  | -2.48417 | 1.97271  |
| C    | -3.72275  | -2.25263 | 0.6767   |
| H    | -4.33703  | -2.30981 | -0.21086 |
| C    | -2.35408  | -1.99285 | 0.61718  |
| H    | -1.82937  | -1.80374 | -0.31187 |
| C    | 3.11138   | -1.26785 | 3.95234  |
| C    | 3.24066   | -1.56536 | 5.31006  |
| H    | 2.42444   | -1.96965 | 5.89867  |
| C    | 4.50879   | -1.3057  | 5.83115  |
| H    | 4.78124   | -1.48135 | 6.86398  |
| C    | 5.43002   | -0.78234 | 4.90472  |
| C    | -5.52709  | -2.75772 | 2.45178  |
| C    | -6.70443  | -2.67014 | 1.69177  |
| C    | -8.01704  | -2.99233 | 2.13195  |
| H    | -8.19867  | -3.37391 | 3.1289   |
| C    | -9.01115  | -2.77358 | 1.20142  |
| H    | -10.05999 | -2.95714 | 1.39505  |
| C    | -8.56315  | -2.26533 | -0.04551 |
| C    | 6.77834   | -0.41814 | 5.17816  |
| C    | 7.68613   | 0.18329  | 4.29499  |
| C    | 9.03334   | 0.54064  | 4.58106  |
| H    | 9.47528   | 0.34307  | 5.54955  |
| C    | 9.70122   | 1.15697  | 3.54524  |
| H    | 10.7243   | 1.50271  | 3.61661  |
| C    | 8.93758   | 1.33443  | 2.36122  |
| C    | -9.36265  | -1.95349 | -1.16602 |
| S    | -0.39162  | 1.85159  | -3.71017 |
| S    | 2.86981   | 2.37923  | -3.12655 |
| S    | -4.63286  | 0.64061  | -3.32882 |
| S    | 6.8011    | 2.07653  | -0.02533 |
| S    | -7.32104  | -0.65814 | -2.62672 |
| C    | 0.32982   | 1.75885  | -2.1059  |
| C    | -0.64034  | 1.39293  | -1.17109 |
| H    | -0.42167  | 1.27518  | -0.11673 |
| C    | -1.91276  | 1.19074  | -1.71789 |
| H    | -2.77617  | 0.90943  | -1.12552 |
| C    | -1.98097  | 1.39539  | -3.09588 |
| C    | 1.71195   | 2.01107  | -1.85896 |
| C    | 4.21556   | 2.48417  | -1.97271 |
| C    | 3.72275   | 2.25263  | -0.6767  |
| H    | 4.33703   | 2.30981  | 0.21086  |

|   |           |          |          |
|---|-----------|----------|----------|
| C | 2.35408   | 1.99285  | -0.61718 |
| H | 1.82937   | 1.80374  | 0.31187  |
| C | -3.11138  | 1.26785  | -3.95234 |
| C | -3.24066  | 1.56536  | -5.31006 |
| H | -2.42444  | 1.96965  | -5.89867 |
| C | -4.50879  | 1.3057   | -5.83115 |
| H | -4.78124  | 1.48135  | -6.86398 |
| C | -5.43002  | 0.78234  | -4.90472 |
| C | 5.52709   | 2.75772  | -2.45178 |
| C | 6.70443   | 2.67014  | -1.69177 |
| C | 8.01704   | 2.99233  | -2.13195 |
| H | 8.19867   | 3.37391  | -3.1289  |
| C | 9.01115   | 2.77358  | -1.20142 |
| H | 10.05999  | 2.95714  | -1.39505 |
| C | 8.56315   | 2.26533  | 0.04551  |
| C | -6.77834  | 0.41814  | -5.17816 |
| C | -7.68613  | -0.18329 | -4.29499 |
| C | -9.03334  | -0.54064 | -4.58106 |
| H | -9.47528  | -0.34307 | -5.54955 |
| C | -9.70122  | -1.15697 | -3.54524 |
| H | -10.7243  | -1.50271 | -3.61661 |
| C | -8.93758  | -1.33443 | -2.36122 |
| C | 9.36265   | 1.95349  | 1.16602  |
| H | 5.63357   | 3.03709  | -3.47917 |
| H | -7.12825  | 0.61492  | -6.17    |
| H | -10.39807 | -2.21651 | -1.1058  |
| H | -5.63357  | -3.03709 | 3.47917  |
| H | 7.12825   | -0.61492 | 6.17     |
| H | 10.39807  | 2.21651  | 1.1058   |

**(3) Function and Basis set- ubvp86/6-31g(d,p)**

| Atom | X         | Y        | Z        |
|------|-----------|----------|----------|
| S    | 0.39162   | -1.85159 | 3.71017  |
| S    | -2.86981  | -2.37923 | 3.12655  |
| S    | 4.63286   | -0.64061 | 3.32882  |
| S    | -6.8011   | -2.07653 | 0.02533  |
| S    | 7.32104   | 0.65814  | 2.62672  |
| C    | -0.32982  | -1.75885 | 2.1059   |
| C    | 0.64034   | -1.39293 | 1.17109  |
| H    | 0.42167   | -1.27518 | 0.11673  |
| C    | 1.91276   | -1.19074 | 1.71789  |
| H    | 2.77617   | -0.90943 | 1.12552  |
| C    | 1.98097   | -1.39539 | 3.09588  |
| C    | -1.71195  | -2.01107 | 1.85896  |
| C    | -4.21556  | -2.48417 | 1.97271  |
| C    | -3.72275  | -2.25263 | 0.6767   |
| H    | -4.33703  | -2.30981 | -0.21086 |
| C    | -2.35408  | -1.99285 | 0.61718  |
| H    | -1.82937  | -1.80374 | -0.31187 |
| C    | 3.11138   | -1.26785 | 3.95234  |
| C    | 3.24066   | -1.56536 | 5.31006  |
| H    | 2.42444   | -1.96965 | 5.89867  |
| C    | 4.50879   | -1.3057  | 5.83115  |
| H    | 4.78124   | -1.48135 | 6.86398  |
| C    | 5.43002   | -0.78234 | 4.90472  |
| C    | -5.52709  | -2.75772 | 2.45178  |
| C    | -6.70443  | -2.67014 | 1.69177  |
| C    | -8.01704  | -2.99233 | 2.13195  |
| H    | -8.19867  | -3.37391 | 3.1289   |
| C    | -9.01115  | -2.77358 | 1.20142  |
| H    | -10.05999 | -2.95714 | 1.39505  |
| C    | -8.56315  | -2.26533 | -0.04551 |
| C    | 6.77834   | -0.41814 | 5.17816  |
| C    | 7.68613   | 0.18329  | 4.29499  |
| C    | 9.03334   | 0.54064  | 4.58106  |
| H    | 9.47528   | 0.34307  | 5.54955  |
| C    | 9.70122   | 1.15697  | 3.54524  |
| H    | 10.7243   | 1.50271  | 3.61661  |
| C    | 8.93758   | 1.33443  | 2.36122  |
| C    | -9.36265  | -1.95349 | -1.16602 |
| S    | -0.39162  | 1.85159  | -3.71017 |
| S    | 2.86981   | 2.37923  | -3.12655 |
| S    | -4.63286  | 0.64061  | -3.32882 |
| S    | 6.8011    | 2.07653  | -0.02533 |
| S    | -7.32104  | -0.65814 | -2.62672 |
| C    | 0.32982   | 1.75885  | -2.1059  |
| C    | -0.64034  | 1.39293  | -1.17109 |
| H    | -0.42167  | 1.27518  | -0.11673 |
| C    | -1.91276  | 1.19074  | -1.71789 |
| H    | -2.77617  | 0.90943  | -1.12552 |
| C    | -1.98097  | 1.39539  | -3.09588 |
| C    | 1.71195   | 2.01107  | -1.85896 |
| C    | 4.21556   | 2.48417  | -1.97271 |
| C    | 3.72275   | 2.25263  | -0.6767  |
| H    | 4.33703   | 2.30981  | 0.21086  |

|   |           |          |          |
|---|-----------|----------|----------|
| C | 2.35408   | 1.99285  | -0.61718 |
| H | 1.82937   | 1.80374  | 0.31187  |
| C | -3.11138  | 1.26785  | -3.95234 |
| C | -3.24066  | 1.56536  | -5.31006 |
| H | -2.42444  | 1.96965  | -5.89867 |
| C | -4.50879  | 1.3057   | -5.83115 |
| H | -4.78124  | 1.48135  | -6.86398 |
| C | -5.43002  | 0.78234  | -4.90472 |
| C | 5.52709   | 2.75772  | -2.45178 |
| C | 6.70443   | 2.67014  | -1.69177 |
| C | 8.01704   | 2.99233  | -2.13195 |
| H | 8.19867   | 3.37391  | -3.1289  |
| C | 9.01115   | 2.77358  | -1.20142 |
| H | 10.05999  | 2.95714  | -1.39505 |
| C | 8.56315   | 2.26533  | 0.04551  |
| C | -6.77834  | 0.41814  | -5.17816 |
| C | -7.68613  | -0.18329 | -4.29499 |
| C | -9.03334  | -0.54064 | -4.58106 |
| H | -9.47528  | -0.34307 | -5.54955 |
| C | -9.70122  | -1.15697 | -3.54524 |
| H | -10.7243  | -1.50271 | -3.61661 |
| C | -8.93758  | -1.33443 | -2.36122 |
| C | 9.36265   | 1.95349  | 1.16602  |
| H | 5.63357   | 3.03709  | -3.47917 |
| H | -7.12825  | 0.61492  | -6.17    |
| H | -10.39807 | -2.21651 | -1.1058  |
| H | -5.63357  | -3.03709 | 3.47917  |
| H | 7.12825   | -0.61492 | 6.17     |
| H | 10.39807  | 2.21651  | 1.1058   |

**(4) Function and Basis set- ub3pw91/6-31g(d,p)**

| Atom | X         | Y        | Z        |
|------|-----------|----------|----------|
| S    | 0.39162   | -1.85159 | 3.71017  |
| S    | -2.86981  | -2.37923 | 3.12655  |
| S    | 4.63286   | -0.64061 | 3.32882  |
| S    | -6.8011   | -2.07653 | 0.02533  |
| S    | 7.32104   | 0.65814  | 2.62672  |
| C    | -0.32982  | -1.75885 | 2.1059   |
| C    | 0.64034   | -1.39293 | 1.17109  |
| H    | 0.42167   | -1.27518 | 0.11673  |
| C    | 1.91276   | -1.19074 | 1.71789  |
| H    | 2.77617   | -0.90943 | 1.12552  |
| C    | 1.98097   | -1.39539 | 3.09588  |
| C    | -1.71195  | -2.01107 | 1.85896  |
| C    | -4.21556  | -2.48417 | 1.97271  |
| C    | -3.72275  | -2.25263 | 0.6767   |
| H    | -4.33703  | -2.30981 | -0.21086 |
| C    | -2.35408  | -1.99285 | 0.61718  |
| H    | -1.82937  | -1.80374 | -0.31187 |
| C    | 3.11138   | -1.26785 | 3.95234  |
| C    | 3.24066   | -1.56536 | 5.31006  |
| H    | 2.42444   | -1.96965 | 5.89867  |
| C    | 4.50879   | -1.3057  | 5.83115  |
| H    | 4.78124   | -1.48135 | 6.86398  |
| C    | 5.43002   | -0.78234 | 4.90472  |
| C    | -5.52709  | -2.75772 | 2.45178  |
| C    | -6.70443  | -2.67014 | 1.69177  |
| C    | -8.01704  | -2.99233 | 2.13195  |
| H    | -8.19867  | -3.37391 | 3.1289   |
| C    | -9.01115  | -2.77358 | 1.20142  |
| H    | -10.05999 | -2.95714 | 1.39505  |
| C    | -8.56315  | -2.26533 | -0.04551 |
| C    | 6.77834   | -0.41814 | 5.17816  |
| C    | 7.68613   | 0.18329  | 4.29499  |
| C    | 9.03334   | 0.54064  | 4.58106  |
| H    | 9.47528   | 0.34307  | 5.54955  |
| C    | 9.70122   | 1.15697  | 3.54524  |
| H    | 10.7243   | 1.50271  | 3.61661  |
| C    | 8.93758   | 1.33443  | 2.36122  |
| C    | -9.36265  | -1.95349 | -1.16602 |
| S    | -0.39162  | 1.85159  | -3.71017 |
| S    | 2.86981   | 2.37923  | -3.12655 |
| S    | -4.63286  | 0.64061  | -3.32882 |
| S    | 6.8011    | 2.07653  | -0.02533 |
| S    | -7.32104  | -0.65814 | -2.62672 |
| C    | 0.32982   | 1.75885  | -2.1059  |
| C    | -0.64034  | 1.39293  | -1.17109 |
| H    | -0.42167  | 1.27518  | -0.11673 |
| C    | -1.91276  | 1.19074  | -1.71789 |
| H    | -2.77617  | 0.90943  | -1.12552 |
| C    | -1.98097  | 1.39539  | -3.09588 |
| C    | 1.71195   | 2.01107  | -1.85896 |
| C    | 4.21556   | 2.48417  | -1.97271 |
| C    | 3.72275   | 2.25263  | -0.6767  |
| H    | 4.33703   | 2.30981  | 0.21086  |



|   |           |          |          |
|---|-----------|----------|----------|
| C | 2.35408   | 1.99285  | -0.61718 |
| H | 1.82937   | 1.80374  | 0.31187  |
| C | -3.11138  | 1.26785  | -3.95234 |
| C | -3.24066  | 1.56536  | -5.31006 |
| H | -2.42444  | 1.96965  | -5.89867 |
| C | -4.50879  | 1.3057   | -5.83115 |
| H | -4.78124  | 1.48135  | -6.86398 |
| C | -5.43002  | 0.78234  | -4.90472 |
| C | 5.52709   | 2.75772  | -2.45178 |
| C | 6.70443   | 2.67014  | -1.69177 |
| C | 8.01704   | 2.99233  | -2.13195 |
| H | 8.19867   | 3.37391  | -3.1289  |
| C | 9.01115   | 2.77358  | -1.20142 |
| H | 10.05999  | 2.95714  | -1.39505 |
| C | 8.56315   | 2.26533  | 0.04551  |
| C | -6.77834  | 0.41814  | -5.17816 |
| C | -7.68613  | -0.18329 | -4.29499 |
| C | -9.03334  | -0.54064 | -4.58106 |
| H | -9.47528  | -0.34307 | -5.54955 |
| C | -9.70122  | -1.15697 | -3.54524 |
| H | -10.7243  | -1.50271 | -3.61661 |
| C | -8.93758  | -1.33443 | -2.36122 |
| C | 9.36265   | 1.95349  | 1.16602  |
| H | 5.63357   | 3.03709  | -3.47917 |
| H | -7.12825  | 0.61492  | -6.17    |
| H | -10.39807 | -2.21651 | -1.1058  |
| H | -5.63357  | -3.03709 | 3.47917  |
| H | 7.12825   | -0.61492 | 6.17     |
| H | 10.39807  | 2.21651  | 1.1058   |

**(5) Function and Basis set-ulsda/6-31g(d,p)**

| Atom | X         | Y        | Z        |
|------|-----------|----------|----------|
| S    | 0.39162   | -1.85159 | 3.71017  |
| S    | -2.86981  | -2.37923 | 3.12655  |
| S    | 4.63286   | -0.64061 | 3.32882  |
| S    | -6.8011   | -2.07653 | 0.02533  |
| S    | 7.32104   | 0.65814  | 2.62672  |
| C    | -0.32982  | -1.75885 | 2.1059   |
| C    | 0.64034   | -1.39293 | 1.17109  |
| H    | 0.42167   | -1.27518 | 0.11673  |
| C    | 1.91276   | -1.19074 | 1.71789  |
| H    | 2.77617   | -0.90943 | 1.12552  |
| C    | 1.98097   | -1.39539 | 3.09588  |
| C    | -1.71195  | -2.01107 | 1.85896  |
| C    | -4.21556  | -2.48417 | 1.97271  |
| C    | -3.72275  | -2.25263 | 0.6767   |
| H    | -4.33703  | -2.30981 | -0.21086 |
| C    | -2.35408  | -1.99285 | 0.61718  |
| H    | -1.82937  | -1.80374 | -0.31187 |
| C    | 3.11138   | -1.26785 | 3.95234  |
| C    | 3.24066   | -1.56536 | 5.31006  |
| H    | 2.42444   | -1.96965 | 5.89867  |
| C    | 4.50879   | -1.3057  | 5.83115  |
| H    | 4.78124   | -1.48135 | 6.86398  |
| C    | 5.43002   | -0.78234 | 4.90472  |
| C    | -5.52709  | -2.75772 | 2.45178  |
| C    | -6.70443  | -2.67014 | 1.69177  |
| C    | -8.01704  | -2.99233 | 2.13195  |
| H    | -8.19867  | -3.37391 | 3.1289   |
| C    | -9.01115  | -2.77358 | 1.20142  |
| H    | -10.05999 | -2.95714 | 1.39505  |
| C    | -8.56315  | -2.26533 | -0.04551 |
| C    | 6.77834   | -0.41814 | 5.17816  |
| C    | 7.68613   | 0.18329  | 4.29499  |
| C    | 9.03334   | 0.54064  | 4.58106  |
| H    | 9.47528   | 0.34307  | 5.54955  |
| C    | 9.70122   | 1.15697  | 3.54524  |
| H    | 10.7243   | 1.50271  | 3.61661  |
| C    | 8.93758   | 1.33443  | 2.36122  |
| C    | -9.36265  | -1.95349 | -1.16602 |
| S    | -0.39162  | 1.85159  | -3.71017 |
| S    | 2.86981   | 2.37923  | -3.12655 |
| S    | -4.63286  | 0.64061  | -3.32882 |
| S    | 6.8011    | 2.07653  | -0.02533 |
| S    | -7.32104  | -0.65814 | -2.62672 |
| C    | 0.32982   | 1.75885  | -2.1059  |
| C    | -0.64034  | 1.39293  | -1.17109 |
| H    | -0.42167  | 1.27518  | -0.11673 |
| C    | -1.91276  | 1.19074  | -1.71789 |
| H    | -2.77617  | 0.90943  | -1.12552 |
| C    | -1.98097  | 1.39539  | -3.09588 |
| C    | 1.71195   | 2.01107  | -1.85896 |
| C    | 4.21556   | 2.48417  | -1.97271 |
| C    | 3.72275   | 2.25263  | -0.6767  |
| H    | 4.33703   | 2.30981  | 0.21086  |

|   |           |          |          |
|---|-----------|----------|----------|
| C | 2.35408   | 1.99285  | -0.61718 |
| H | 1.82937   | 1.80374  | 0.31187  |
| C | -3.11138  | 1.26785  | -3.95234 |
| C | -3.24066  | 1.56536  | -5.31006 |
| H | -2.42444  | 1.96965  | -5.89867 |
| C | -4.50879  | 1.3057   | -5.83115 |
| H | -4.78124  | 1.48135  | -6.86398 |
| C | -5.43002  | 0.78234  | -4.90472 |
| C | 5.52709   | 2.75772  | -2.45178 |
| C | 6.70443   | 2.67014  | -1.69177 |
| C | 8.01704   | 2.99233  | -2.13195 |
| H | 8.19867   | 3.37391  | -3.1289  |
| C | 9.01115   | 2.77358  | -1.20142 |
| H | 10.05999  | 2.95714  | -1.39505 |
| C | 8.56315   | 2.26533  | 0.04551  |
| C | -6.77834  | 0.41814  | -5.17816 |
| C | -7.68613  | -0.18329 | -4.29499 |
| C | -9.03334  | -0.54064 | -4.58106 |
| H | -9.47528  | -0.34307 | -5.54955 |
| C | -9.70122  | -1.15697 | -3.54524 |
| H | -10.7243  | -1.50271 | -3.61661 |
| C | -8.93758  | -1.33443 | -2.36122 |
| C | 9.36265   | 1.95349  | 1.16602  |
| H | 5.63357   | 3.03709  | -3.47917 |
| H | -7.12825  | 0.61492  | -6.17    |
| H | -10.39807 | -2.21651 | -1.1058  |
| H | -5.63357  | -3.03709 | 3.47917  |
| H | 7.12825   | -0.61492 | 6.17     |
| H | 10.39807  | 2.21651  | 1.1058   |

**(6) Function and Basis set-umpwlpw91/6-31g(d,p)**

| Atom | X         | Y        | Z        |
|------|-----------|----------|----------|
| S    | 0.39162   | -1.85159 | 3.71017  |
| S    | -2.86981  | -2.37923 | 3.12655  |
| S    | 4.63286   | -0.64061 | 3.32882  |
| S    | -6.8011   | -2.07653 | 0.02533  |
| S    | 7.32104   | 0.65814  | 2.62672  |
| C    | -0.32982  | -1.75885 | 2.1059   |
| C    | 0.64034   | -1.39293 | 1.17109  |
| H    | 0.42167   | -1.27518 | 0.11673  |
| C    | 1.91276   | -1.19074 | 1.71789  |
| H    | 2.77617   | -0.90943 | 1.12552  |
| C    | 1.98097   | -1.39539 | 3.09588  |
| C    | -1.71195  | -2.01107 | 1.85896  |
| C    | -4.21556  | -2.48417 | 1.97271  |
| C    | -3.72275  | -2.25263 | 0.6767   |
| H    | -4.33703  | -2.30981 | -0.21086 |
| C    | -2.35408  | -1.99285 | 0.61718  |
| H    | -1.82937  | -1.80374 | -0.31187 |
| C    | 3.11138   | -1.26785 | 3.95234  |
| C    | 3.24066   | -1.56536 | 5.31006  |
| H    | 2.42444   | -1.96965 | 5.89867  |
| C    | 4.50879   | -1.3057  | 5.83115  |
| H    | 4.78124   | -1.48135 | 6.86398  |
| C    | 5.43002   | -0.78234 | 4.90472  |
| C    | -5.52709  | -2.75772 | 2.45178  |
| C    | -6.70443  | -2.67014 | 1.69177  |
| C    | -8.01704  | -2.99233 | 2.13195  |
| H    | -8.19867  | -3.37391 | 3.1289   |
| C    | -9.01115  | -2.77358 | 1.20142  |
| H    | -10.05999 | -2.95714 | 1.39505  |
| C    | -8.56315  | -2.26533 | -0.04551 |
| C    | 6.77834   | -0.41814 | 5.17816  |
| C    | 7.68613   | 0.18329  | 4.29499  |
| C    | 9.03334   | 0.54064  | 4.58106  |
| H    | 9.47528   | 0.34307  | 5.54955  |
| C    | 9.70122   | 1.15697  | 3.54524  |
| H    | 10.7243   | 1.50271  | 3.61661  |
| C    | 8.93758   | 1.33443  | 2.36122  |
| C    | -9.36265  | -1.95349 | -1.16602 |
| S    | -0.39162  | 1.85159  | -3.71017 |
| S    | 2.86981   | 2.37923  | -3.12655 |
| S    | -4.63286  | 0.64061  | -3.32882 |
| S    | 6.8011    | 2.07653  | -0.02533 |
| S    | -7.32104  | -0.65814 | -2.62672 |
| C    | 0.32982   | 1.75885  | -2.1059  |
| C    | -0.64034  | 1.39293  | -1.17109 |
| H    | -0.42167  | 1.27518  | -0.11673 |
| C    | -1.91276  | 1.19074  | -1.71789 |
| H    | -2.77617  | 0.90943  | -1.12552 |
| C    | -1.98097  | 1.39539  | -3.09588 |
| C    | 1.71195   | 2.01107  | -1.85896 |
| C    | 4.21556   | 2.48417  | -1.97271 |
| C    | 3.72275   | 2.25263  | -0.6767  |
| H    | 4.33703   | 2.30981  | 0.21086  |

|   |           |          |          |
|---|-----------|----------|----------|
| C | 2.35408   | 1.99285  | -0.61718 |
| H | 1.82937   | 1.80374  | 0.31187  |
| C | -3.11138  | 1.26785  | -3.95234 |
| C | -3.24066  | 1.56536  | -5.31006 |
| H | -2.42444  | 1.96965  | -5.89867 |
| C | -4.50879  | 1.3057   | -5.83115 |
| H | -4.78124  | 1.48135  | -6.86398 |
| C | -5.43002  | 0.78234  | -4.90472 |
| C | 5.52709   | 2.75772  | -2.45178 |
| C | 6.70443   | 2.67014  | -1.69177 |
| C | 8.01704   | 2.99233  | -2.13195 |
| H | 8.19867   | 3.37391  | -3.1289  |
| C | 9.01115   | 2.77358  | -1.20142 |
| H | 10.05999  | 2.95714  | -1.39505 |
| C | 8.56315   | 2.26533  | 0.04551  |
| C | -6.77834  | 0.41814  | -5.17816 |
| C | -7.68613  | -0.18329 | -4.29499 |
| C | -9.03334  | -0.54064 | -4.58106 |
| H | -9.47528  | -0.34307 | -5.54955 |
| C | -9.70122  | -1.15697 | -3.54524 |
| H | -10.7243  | -1.50271 | -3.61661 |
| C | -8.93758  | -1.33443 | -2.36122 |
| C | 9.36265   | 1.95349  | 1.16602  |
| H | 5.63357   | 3.03709  | -3.47917 |
| H | -7.12825  | 0.61492  | -6.17    |
| H | -10.39807 | -2.21651 | -1.1058  |
| H | -5.63357  | -3.03709 | 3.47917  |
| H | 7.12825   | -0.61492 | 6.17     |
| H | 10.39807  | 2.21651  | 1.1058   |

**(7) Function and Basis set-upbepbe/6-31g(d,p)**

| Atom | X         | Y        | Z        |
|------|-----------|----------|----------|
| S    | 0.39162   | -1.85159 | 3.71017  |
| S    | -2.86981  | -2.37923 | 3.12655  |
| S    | 4.63286   | -0.64061 | 3.32882  |
| S    | -6.8011   | -2.07653 | 0.02533  |
| S    | 7.32104   | 0.65814  | 2.62672  |
| C    | -0.32982  | -1.75885 | 2.1059   |
| C    | 0.64034   | -1.39293 | 1.17109  |
| H    | 0.42167   | -1.27518 | 0.11673  |
| C    | 1.91276   | -1.19074 | 1.71789  |
| H    | 2.77617   | -0.90943 | 1.12552  |
| C    | 1.98097   | -1.39539 | 3.09588  |
| C    | -1.71195  | -2.01107 | 1.85896  |
| C    | -4.21556  | -2.48417 | 1.97271  |
| C    | -3.72275  | -2.25263 | 0.6767   |
| H    | -4.33703  | -2.30981 | -0.21086 |
| C    | -2.35408  | -1.99285 | 0.61718  |
| H    | -1.82937  | -1.80374 | -0.31187 |
| C    | 3.11138   | -1.26785 | 3.95234  |
| C    | 3.24066   | -1.56536 | 5.31006  |
| H    | 2.42444   | -1.96965 | 5.89867  |
| C    | 4.50879   | -1.3057  | 5.83115  |
| H    | 4.78124   | -1.48135 | 6.86398  |
| C    | 5.43002   | -0.78234 | 4.90472  |
| C    | -5.52709  | -2.75772 | 2.45178  |
| C    | -6.70443  | -2.67014 | 1.69177  |
| C    | -8.01704  | -2.99233 | 2.13195  |
| H    | -8.19867  | -3.37391 | 3.1289   |
| C    | -9.01115  | -2.77358 | 1.20142  |
| H    | -10.05999 | -2.95714 | 1.39505  |
| C    | -8.56315  | -2.26533 | -0.04551 |
| C    | 6.77834   | -0.41814 | 5.17816  |
| C    | 7.68613   | 0.18329  | 4.29499  |
| C    | 9.03334   | 0.54064  | 4.58106  |
| H    | 9.47528   | 0.34307  | 5.54955  |
| C    | 9.70122   | 1.15697  | 3.54524  |
| H    | 10.7243   | 1.50271  | 3.61661  |
| C    | 8.93758   | 1.33443  | 2.36122  |
| C    | -9.36265  | -1.95349 | -1.16602 |
| S    | -0.39162  | 1.85159  | -3.71017 |
| S    | 2.86981   | 2.37923  | -3.12655 |
| S    | -4.63286  | 0.64061  | -3.32882 |
| S    | 6.8011    | 2.07653  | -0.02533 |
| S    | -7.32104  | -0.65814 | -2.62672 |
| C    | 0.32982   | 1.75885  | -2.1059  |
| C    | -0.64034  | 1.39293  | -1.17109 |
| H    | -0.42167  | 1.27518  | -0.11673 |
| C    | -1.91276  | 1.19074  | -1.71789 |
| H    | -2.77617  | 0.90943  | -1.12552 |
| C    | -1.98097  | 1.39539  | -3.09588 |
| C    | 1.71195   | 2.01107  | -1.85896 |
| C    | 4.21556   | 2.48417  | -1.97271 |
| C    | 3.72275   | 2.25263  | -0.6767  |
| H    | 4.33703   | 2.30981  | 0.21086  |

|   |           |          |          |
|---|-----------|----------|----------|
| C | 2.35408   | 1.99285  | -0.61718 |
| H | 1.82937   | 1.80374  | 0.31187  |
| C | -3.11138  | 1.26785  | -3.95234 |
| C | -3.24066  | 1.56536  | -5.31006 |
| H | -2.42444  | 1.96965  | -5.89867 |
| C | -4.50879  | 1.3057   | -5.83115 |
| H | -4.78124  | 1.48135  | -6.86398 |
| C | -5.43002  | 0.78234  | -4.90472 |
| C | 5.52709   | 2.75772  | -2.45178 |
| C | 6.70443   | 2.67014  | -1.69177 |
| C | 8.01704   | 2.99233  | -2.13195 |
| H | 8.19867   | 3.37391  | -3.1289  |
| C | 9.01115   | 2.77358  | -1.20142 |
| H | 10.05999  | 2.95714  | -1.39505 |
| C | 8.56315   | 2.26533  | 0.04551  |
| C | -6.77834  | 0.41814  | -5.17816 |
| C | -7.68613  | -0.18329 | -4.29499 |
| C | -9.03334  | -0.54064 | -4.58106 |
| H | -9.47528  | -0.34307 | -5.54955 |
| C | -9.70122  | -1.15697 | -3.54524 |
| H | -10.7243  | -1.50271 | -3.61661 |
| C | -8.93758  | -1.33443 | -2.36122 |
| C | 9.36265   | 1.95349  | 1.16602  |
| H | 5.63357   | 3.03709  | -3.47917 |
| H | -7.12825  | 0.61492  | -6.17    |
| H | -10.39807 | -2.21651 | -1.1058  |
| H | -5.63357  | -3.03709 | 3.47917  |
| H | 7.12825   | -0.61492 | 6.17     |
| H | 10.39807  | 2.21651  | 1.1058   |

**(8) Function and Basis set-uhsehlpe/6-31g(d,p)**

| Atom | X         | Y        | Z        |
|------|-----------|----------|----------|
| S    | 0.39162   | -1.85159 | 3.71017  |
| S    | -2.86981  | -2.37923 | 3.12655  |
| S    | 4.63286   | -0.64061 | 3.32882  |
| S    | -6.8011   | -2.07653 | 0.02533  |
| S    | 7.32104   | 0.65814  | 2.62672  |
| C    | -0.32982  | -1.75885 | 2.1059   |
| C    | 0.64034   | -1.39293 | 1.17109  |
| H    | 0.42167   | -1.27518 | 0.11673  |
| C    | 1.91276   | -1.19074 | 1.71789  |
| H    | 2.77617   | -0.90943 | 1.12552  |
| C    | 1.98097   | -1.39539 | 3.09588  |
| C    | -1.71195  | -2.01107 | 1.85896  |
| C    | -4.21556  | -2.48417 | 1.97271  |
| C    | -3.72275  | -2.25263 | 0.6767   |
| H    | -4.33703  | -2.30981 | -0.21086 |
| C    | -2.35408  | -1.99285 | 0.61718  |
| H    | -1.82937  | -1.80374 | -0.31187 |
| C    | 3.11138   | -1.26785 | 3.95234  |
| C    | 3.24066   | -1.56536 | 5.31006  |
| H    | 2.42444   | -1.96965 | 5.89867  |
| C    | 4.50879   | -1.3057  | 5.83115  |
| H    | 4.78124   | -1.48135 | 6.86398  |
| C    | 5.43002   | -0.78234 | 4.90472  |
| C    | -5.52709  | -2.75772 | 2.45178  |
| C    | -6.70443  | -2.67014 | 1.69177  |
| C    | -8.01704  | -2.99233 | 2.13195  |
| H    | -8.19867  | -3.37391 | 3.1289   |
| C    | -9.01115  | -2.77358 | 1.20142  |
| H    | -10.05999 | -2.95714 | 1.39505  |
| C    | -8.56315  | -2.26533 | -0.04551 |
| C    | 6.77834   | -0.41814 | 5.17816  |
| C    | 7.68613   | 0.18329  | 4.29499  |
| C    | 9.03334   | 0.54064  | 4.58106  |
| H    | 9.47528   | 0.34307  | 5.54955  |
| C    | 9.70122   | 1.15697  | 3.54524  |
| H    | 10.7243   | 1.50271  | 3.61661  |
| C    | 8.93758   | 1.33443  | 2.36122  |
| C    | -9.36265  | -1.95349 | -1.16602 |
| S    | -0.39162  | 1.85159  | -3.71017 |
| S    | 2.86981   | 2.37923  | -3.12655 |
| S    | -4.63286  | 0.64061  | -3.32882 |
| S    | 6.8011    | 2.07653  | -0.02533 |
| S    | -7.32104  | -0.65814 | -2.62672 |
| C    | 0.32982   | 1.75885  | -2.1059  |
| C    | -0.64034  | 1.39293  | -1.17109 |
| H    | -0.42167  | 1.27518  | -0.11673 |
| C    | -1.91276  | 1.19074  | -1.71789 |
| H    | -2.77617  | 0.90943  | -1.12552 |
| C    | -1.98097  | 1.39539  | -3.09588 |
| C    | 1.71195   | 2.01107  | -1.85896 |
| C    | 4.21556   | 2.48417  | -1.97271 |
| C    | 3.72275   | 2.25263  | -0.6767  |
| H    | 4.33703   | 2.30981  | 0.21086  |



|   |           |          |          |
|---|-----------|----------|----------|
| C | 2.35408   | 1.99285  | -0.61718 |
| H | 1.82937   | 1.80374  | 0.31187  |
| C | -3.11138  | 1.26785  | -3.95234 |
| C | -3.24066  | 1.56536  | -5.31006 |
| H | -2.42444  | 1.96965  | -5.89867 |
| C | -4.50879  | 1.3057   | -5.83115 |
| H | -4.78124  | 1.48135  | -6.86398 |
| C | -5.43002  | 0.78234  | -4.90472 |
| C | 5.52709   | 2.75772  | -2.45178 |
| C | 6.70443   | 2.67014  | -1.69177 |
| C | 8.01704   | 2.99233  | -2.13195 |
| H | 8.19867   | 3.37391  | -3.1289  |
| C | 9.01115   | 2.77358  | -1.20142 |
| H | 10.05999  | 2.95714  | -1.39505 |
| C | 8.56315   | 2.26533  | 0.04551  |
| C | -6.77834  | 0.41814  | -5.17816 |
| C | -7.68613  | -0.18329 | -4.29499 |
| C | -9.03334  | -0.54064 | -4.58106 |
| H | -9.47528  | -0.34307 | -5.54955 |
| C | -9.70122  | -1.15697 | -3.54524 |
| H | -10.7243  | -1.50271 | -3.61661 |
| C | -8.93758  | -1.33443 | -2.36122 |
| C | 9.36265   | 1.95349  | 1.16602  |
| H | 5.63357   | 3.03709  | -3.47917 |
| H | -7.12825  | 0.61492  | -6.17    |
| H | -10.39807 | -2.21651 | -1.1058  |
| H | -5.63357  | -3.03709 | 3.47917  |
| H | 7.12825   | -0.61492 | 6.17     |
| H | 10.39807  | 2.21651  | 1.1058   |

**(9) Function and Basis set-uhcth/6-31g(d,p)**

| Atom | X         | Y        | Z        |
|------|-----------|----------|----------|
| S    | 0.39162   | -1.85159 | 3.71017  |
| S    | -2.86981  | -2.37923 | 3.12655  |
| S    | 4.63286   | -0.64061 | 3.32882  |
| S    | -6.8011   | -2.07653 | 0.02533  |
| S    | 7.32104   | 0.65814  | 2.62672  |
| C    | -0.32982  | -1.75885 | 2.1059   |
| C    | 0.64034   | -1.39293 | 1.17109  |
| H    | 0.42167   | -1.27518 | 0.11673  |
| C    | 1.91276   | -1.19074 | 1.71789  |
| H    | 2.77617   | -0.90943 | 1.12552  |
| C    | 1.98097   | -1.39539 | 3.09588  |
| C    | -1.71195  | -2.01107 | 1.85896  |
| C    | -4.21556  | -2.48417 | 1.97271  |
| C    | -3.72275  | -2.25263 | 0.6767   |
| H    | -4.33703  | -2.30981 | -0.21086 |
| C    | -2.35408  | -1.99285 | 0.61718  |
| H    | -1.82937  | -1.80374 | -0.31187 |
| C    | 3.11138   | -1.26785 | 3.95234  |
| C    | 3.24066   | -1.56536 | 5.31006  |
| H    | 2.42444   | -1.96965 | 5.89867  |
| C    | 4.50879   | -1.3057  | 5.83115  |
| H    | 4.78124   | -1.48135 | 6.86398  |
| C    | 5.43002   | -0.78234 | 4.90472  |
| C    | -5.52709  | -2.75772 | 2.45178  |
| C    | -6.70443  | -2.67014 | 1.69177  |
| C    | -8.01704  | -2.99233 | 2.13195  |
| H    | -8.19867  | -3.37391 | 3.1289   |
| C    | -9.01115  | -2.77358 | 1.20142  |
| H    | -10.05999 | -2.95714 | 1.39505  |
| C    | -8.56315  | -2.26533 | -0.04551 |
| C    | 6.77834   | -0.41814 | 5.17816  |
| C    | 7.68613   | 0.18329  | 4.29499  |
| C    | 9.03334   | 0.54064  | 4.58106  |
| H    | 9.47528   | 0.34307  | 5.54955  |
| C    | 9.70122   | 1.15697  | 3.54524  |
| H    | 10.7243   | 1.50271  | 3.61661  |
| C    | 8.93758   | 1.33443  | 2.36122  |
| C    | -9.36265  | -1.95349 | -1.16602 |
| S    | -0.39162  | 1.85159  | -3.71017 |
| S    | 2.86981   | 2.37923  | -3.12655 |
| S    | -4.63286  | 0.64061  | -3.32882 |
| S    | 6.8011    | 2.07653  | -0.02533 |
| S    | -7.32104  | -0.65814 | -2.62672 |
| C    | 0.32982   | 1.75885  | -2.1059  |
| C    | -0.64034  | 1.39293  | -1.17109 |
| H    | -0.42167  | 1.27518  | -0.11673 |
| C    | -1.91276  | 1.19074  | -1.71789 |
| H    | -2.77617  | 0.90943  | -1.12552 |
| C    | -1.98097  | 1.39539  | -3.09588 |
| C    | 1.71195   | 2.01107  | -1.85896 |
| C    | 4.21556   | 2.48417  | -1.97271 |
| C    | 3.72275   | 2.25263  | -0.6767  |
| H    | 4.33703   | 2.30981  | 0.21086  |

|   |           |          |          |
|---|-----------|----------|----------|
| C | 2.35408   | 1.99285  | -0.61718 |
| H | 1.82937   | 1.80374  | 0.31187  |
| C | -3.11138  | 1.26785  | -3.95234 |
| C | -3.24066  | 1.56536  | -5.31006 |
| H | -2.42444  | 1.96965  | -5.89867 |
| C | -4.50879  | 1.3057   | -5.83115 |
| H | -4.78124  | 1.48135  | -6.86398 |
| C | -5.43002  | 0.78234  | -4.90472 |
| C | 5.52709   | 2.75772  | -2.45178 |
| C | 6.70443   | 2.67014  | -1.69177 |
| C | 8.01704   | 2.99233  | -2.13195 |
| H | 8.19867   | 3.37391  | -3.1289  |
| C | 9.01115   | 2.77358  | -1.20142 |
| H | 10.05999  | 2.95714  | -1.39505 |
| C | 8.56315   | 2.26533  | 0.04551  |
| C | -6.77834  | 0.41814  | -5.17816 |
| C | -7.68613  | -0.18329 | -4.29499 |
| C | -9.03334  | -0.54064 | -4.58106 |
| H | -9.47528  | -0.34307 | -5.54955 |
| C | -9.70122  | -1.15697 | -3.54524 |
| H | -10.7243  | -1.50271 | -3.61661 |
| C | -8.93758  | -1.33443 | -2.36122 |
| C | 9.36265   | 1.95349  | 1.16602  |
| H | 5.63357   | 3.03709  | -3.47917 |
| H | -7.12825  | 0.61492  | -6.17    |
| H | -10.39807 | -2.21651 | -1.1058  |
| H | -5.63357  | -3.03709 | 3.47917  |
| H | 7.12825   | -0.61492 | 6.17     |
| H | 10.39807  | 2.21651  | 1.1058   |

**(10) Function and Basis set- utpsstpss/6-31g(d,p)**

| Atom | X         | Y        | Z        |
|------|-----------|----------|----------|
| S    | 0.39162   | -1.85159 | 3.71017  |
| S    | -2.86981  | -2.37923 | 3.12655  |
| S    | 4.63286   | -0.64061 | 3.32882  |
| S    | -6.8011   | -2.07653 | 0.02533  |
| S    | 7.32104   | 0.65814  | 2.62672  |
| C    | -0.32982  | -1.75885 | 2.1059   |
| C    | 0.64034   | -1.39293 | 1.17109  |
| H    | 0.42167   | -1.27518 | 0.11673  |
| C    | 1.91276   | -1.19074 | 1.71789  |
| H    | 2.77617   | -0.90943 | 1.12552  |
| C    | 1.98097   | -1.39539 | 3.09588  |
| C    | -1.71195  | -2.01107 | 1.85896  |
| C    | -4.21556  | -2.48417 | 1.97271  |
| C    | -3.72275  | -2.25263 | 0.6767   |
| H    | -4.33703  | -2.30981 | -0.21086 |
| C    | -2.35408  | -1.99285 | 0.61718  |
| H    | -1.82937  | -1.80374 | -0.31187 |
| C    | 3.11138   | -1.26785 | 3.95234  |
| C    | 3.24066   | -1.56536 | 5.31006  |
| H    | 2.42444   | -1.96965 | 5.89867  |
| C    | 4.50879   | -1.3057  | 5.83115  |
| H    | 4.78124   | -1.48135 | 6.86398  |
| C    | 5.43002   | -0.78234 | 4.90472  |
| C    | -5.52709  | -2.75772 | 2.45178  |
| C    | -6.70443  | -2.67014 | 1.69177  |
| C    | -8.01704  | -2.99233 | 2.13195  |
| H    | -8.19867  | -3.37391 | 3.1289   |
| C    | -9.01115  | -2.77358 | 1.20142  |
| H    | -10.05999 | -2.95714 | 1.39505  |
| C    | -8.56315  | -2.26533 | -0.04551 |
| C    | 6.77834   | -0.41814 | 5.17816  |
| C    | 7.68613   | 0.18329  | 4.29499  |
| C    | 9.03334   | 0.54064  | 4.58106  |
| H    | 9.47528   | 0.34307  | 5.54955  |
| C    | 9.70122   | 1.15697  | 3.54524  |
| H    | 10.7243   | 1.50271  | 3.61661  |
| C    | 8.93758   | 1.33443  | 2.36122  |
| C    | -9.36265  | -1.95349 | -1.16602 |
| S    | -0.39162  | 1.85159  | -3.71017 |
| S    | 2.86981   | 2.37923  | -3.12655 |
| S    | -4.63286  | 0.64061  | -3.32882 |
| S    | 6.8011    | 2.07653  | -0.02533 |
| S    | -7.32104  | -0.65814 | -2.62672 |
| C    | 0.32982   | 1.75885  | -2.1059  |
| C    | -0.64034  | 1.39293  | -1.17109 |
| H    | -0.42167  | 1.27518  | -0.11673 |
| C    | -1.91276  | 1.19074  | -1.71789 |
| H    | -2.77617  | 0.90943  | -1.12552 |
| C    | -1.98097  | 1.39539  | -3.09588 |
| C    | 1.71195   | 2.01107  | -1.85896 |
| C    | 4.21556   | 2.48417  | -1.97271 |
| C    | 3.72275   | 2.25263  | -0.6767  |
| H    | 4.33703   | 2.30981  | 0.21086  |

|   |           |          |          |
|---|-----------|----------|----------|
| C | 2.35408   | 1.99285  | -0.61718 |
| H | 1.82937   | 1.80374  | 0.31187  |
| C | -3.11138  | 1.26785  | -3.95234 |
| C | -3.24066  | 1.56536  | -5.31006 |
| H | -2.42444  | 1.96965  | -5.89867 |
| C | -4.50879  | 1.3057   | -5.83115 |
| H | -4.78124  | 1.48135  | -6.86398 |
| C | -5.43002  | 0.78234  | -4.90472 |
| C | 5.52709   | 2.75772  | -2.45178 |
| C | 6.70443   | 2.67014  | -1.69177 |
| C | 8.01704   | 2.99233  | -2.13195 |
| H | 8.19867   | 3.37391  | -3.1289  |
| C | 9.01115   | 2.77358  | -1.20142 |
| H | 10.05999  | 2.95714  | -1.39505 |
| C | 8.56315   | 2.26533  | 0.04551  |
| C | -6.77834  | 0.41814  | -5.17816 |
| C | -7.68613  | -0.18329 | -4.29499 |
| C | -9.03334  | -0.54064 | -4.58106 |
| H | -9.47528  | -0.34307 | -5.54955 |
| C | -9.70122  | -1.15697 | -3.54524 |
| H | -10.7243  | -1.50271 | -3.61661 |
| C | -8.93758  | -1.33443 | -2.36122 |
| C | 9.36265   | 1.95349  | 1.16602  |
| H | 5.63357   | 3.03709  | -3.47917 |
| H | -7.12825  | 0.61492  | -6.17    |
| H | -10.39807 | -2.21651 | -1.1058  |
| H | -5.63357  | -3.03709 | 3.47917  |
| H | 7.12825   | -0.61492 | 6.17     |
| H | 10.39807  | 2.21651  | 1.1058   |

**(11) Function and Basis set- uwb97xd/6-31g(d,p)**

| Atom | X         | Y        | Z        |
|------|-----------|----------|----------|
| S    | 0.39162   | -1.85159 | 3.71017  |
| S    | -2.86981  | -2.37923 | 3.12655  |
| S    | 4.63286   | -0.64061 | 3.32882  |
| S    | -6.8011   | -2.07653 | 0.02533  |
| S    | 7.32104   | 0.65814  | 2.62672  |
| C    | -0.32982  | -1.75885 | 2.1059   |
| C    | 0.64034   | -1.39293 | 1.17109  |
| H    | 0.42167   | -1.27518 | 0.11673  |
| C    | 1.91276   | -1.19074 | 1.71789  |
| H    | 2.77617   | -0.90943 | 1.12552  |
| C    | 1.98097   | -1.39539 | 3.09588  |
| C    | -1.71195  | -2.01107 | 1.85896  |
| C    | -4.21556  | -2.48417 | 1.97271  |
| C    | -3.72275  | -2.25263 | 0.6767   |
| H    | -4.33703  | -2.30981 | -0.21086 |
| C    | -2.35408  | -1.99285 | 0.61718  |
| H    | -1.82937  | -1.80374 | -0.31187 |
| C    | 3.11138   | -1.26785 | 3.95234  |
| C    | 3.24066   | -1.56536 | 5.31006  |
| H    | 2.42444   | -1.96965 | 5.89867  |
| C    | 4.50879   | -1.3057  | 5.83115  |
| H    | 4.78124   | -1.48135 | 6.86398  |
| C    | 5.43002   | -0.78234 | 4.90472  |
| C    | -5.52709  | -2.75772 | 2.45178  |
| C    | -6.70443  | -2.67014 | 1.69177  |
| C    | -8.01704  | -2.99233 | 2.13195  |
| H    | -8.19867  | -3.37391 | 3.1289   |
| C    | -9.01115  | -2.77358 | 1.20142  |
| H    | -10.05999 | -2.95714 | 1.39505  |
| C    | -8.56315  | -2.26533 | -0.04551 |
| C    | 6.77834   | -0.41814 | 5.17816  |
| C    | 7.68613   | 0.18329  | 4.29499  |
| C    | 9.03334   | 0.54064  | 4.58106  |
| H    | 9.47528   | 0.34307  | 5.54955  |
| C    | 9.70122   | 1.15697  | 3.54524  |
| H    | 10.7243   | 1.50271  | 3.61661  |
| C    | 8.93758   | 1.33443  | 2.36122  |
| C    | -9.36265  | -1.95349 | -1.16602 |
| S    | -0.39162  | 1.85159  | -3.71017 |
| S    | 2.86981   | 2.37923  | -3.12655 |
| S    | -4.63286  | 0.64061  | -3.32882 |
| S    | 6.8011    | 2.07653  | -0.02533 |
| S    | -7.32104  | -0.65814 | -2.62672 |
| C    | 0.32982   | 1.75885  | -2.1059  |
| C    | -0.64034  | 1.39293  | -1.17109 |
| H    | -0.42167  | 1.27518  | -0.11673 |
| C    | -1.91276  | 1.19074  | -1.71789 |
| H    | -2.77617  | 0.90943  | -1.12552 |
| C    | -1.98097  | 1.39539  | -3.09588 |
| C    | 1.71195   | 2.01107  | -1.85896 |
| C    | 4.21556   | 2.48417  | -1.97271 |
| C    | 3.72275   | 2.25263  | -0.6767  |
| H    | 4.33703   | 2.30981  | 0.21086  |

|   |           |          |          |
|---|-----------|----------|----------|
| C | 2.35408   | 1.99285  | -0.61718 |
| H | 1.82937   | 1.80374  | 0.31187  |
| C | -3.11138  | 1.26785  | -3.95234 |
| C | -3.24066  | 1.56536  | -5.31006 |
| H | -2.42444  | 1.96965  | -5.89867 |
| C | -4.50879  | 1.3057   | -5.83115 |
| H | -4.78124  | 1.48135  | -6.86398 |
| C | -5.43002  | 0.78234  | -4.90472 |
| C | 5.52709   | 2.75772  | -2.45178 |
| C | 6.70443   | 2.67014  | -1.69177 |
| C | 8.01704   | 2.99233  | -2.13195 |
| H | 8.19867   | 3.37391  | -3.1289  |
| C | 9.01115   | 2.77358  | -1.20142 |
| H | 10.05999  | 2.95714  | -1.39505 |
| C | 8.56315   | 2.26533  | 0.04551  |
| C | -6.77834  | 0.41814  | -5.17816 |
| C | -7.68613  | -0.18329 | -4.29499 |
| C | -9.03334  | -0.54064 | -4.58106 |
| H | -9.47528  | -0.34307 | -5.54955 |
| C | -9.70122  | -1.15697 | -3.54524 |
| H | -10.7243  | -1.50271 | -3.61661 |
| C | -8.93758  | -1.33443 | -2.36122 |
| C | 9.36265   | 1.95349  | 1.16602  |
| H | 5.63357   | 3.03709  | -3.47917 |
| H | -7.12825  | 0.61492  | -6.17    |
| H | -10.39807 | -2.21651 | -1.1058  |
| H | -5.63357  | -3.03709 | 3.47917  |
| H | 7.12825   | -0.61492 | 6.17     |
| H | 10.39807  | 2.21651  | 1.1058   |
